# Supplementary material for: Characterization of Yeasts Isolated From Parmigiano Reggiano Cheese Natural Whey Starter: From Spoilage Agents to Potential Cell Factories for Whey Valorization
Source: Preprints.org preprint supplement (doi:10.20944/preprints202109.0210.v1), 2021-09-13
Supplement: Supplementary file 3 [file supplementary]

Article

Characterization of yeasts isolated from Parmigiano Reggiano cheese natural whey starter: from spoilage agents to potential cell factories for whey valorization

Serena Martini 1, Mattia Bonazzi 1, Ilaria Malorgio 1, Valentina Pizzamiglio 2, Davide Tagliazucchi 1, Lisa Solieri 12,*

| **Citation:** Lastname, F.; Lastname, F.; Lastname, F. Title. *Microorganisms* **2021**, *9*, x. https://doi.org/10.3390/xxxxx  Academic Editor: Firstname Lastname  Received: date  Accepted: date  Published: date  **Publisher’s Note:** MDPI stays neutral with regard to jurisdictional claims in published maps and institutional affiliations.  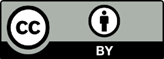  **Copyright:** © 2021 by the authors. Submitted for possible open access publication under the terms and conditions of the Creative Commons Attribution (CC BY) license (https://creativecommons.org/licenses/by/4.0/). |
| --- |

1 Department of Life Sciences, University of Modena and Reggio Emilia, Via Amendola, 2 - Pad. Besta, 42122 Reggio Emilia, Italy. [serena.martini@unimore.it](mailto:serena.martini@unimore.it); [240824@studenti.unimore.it](mailto:240824@studenti.unimore.it); malorgioilaria.94@gmail.com; davide.tagliazucchi@unimore.it; lisa.solieri@unimore.it

2 Consorzio del Formaggio Parmigiano Reggiano, via J.F. Kennedy 18, 42124, Reggio Emilia, Italy. pizzamiglio@parmigianoreggiano.it

* Correspondence: lisa.solieri@unimore.it; Tel.: +39 0522 522026

**Abstract:** Whey is the main by-product of the dairy industry and contains sugars (lactose) and proteins (especially serum proteins and, at lesser extent, residual caseins), which can be valorized by the fermentative action of yeasts. In the present study, we characterized the spoilage yeast fraction inhabiting natural whey starter (NWS), the undefined starter culture of thermophilic lactic acid bacteria used in Parmigiano Reggiano (PR) cheesemaking, and evaluated thermotolerance, mating type, and the aptitude to produce ethanol and bioactive peptides from whey lactose and proteins, respectively, in a selected pool of strains. We found that PR NWS yeast population consists of other species (*Saccharomyces cerevisiae*, *Wickerhamiella pararugosa*, and *Torulaspora delbrueckii*) in addition to the well-documented *Kluyveromyces marxianus*, with multiple biotypes scored within each species. Haploid and diploid *K. marxianus* strains were identified through *MAT* genotyping, while thermotolerance assay allowed the selection of strains suitable to grow up to 48 °C. In whey fermentation assay, one thermotolerant strain was suitable to release ethanol with yield of 86.5%, while another candidate was able to produce the highest amounts of both ethanol and bioactive peptides with potentially anti-hypertensive function. The present work demonstrated that PR NWS is a reservoir of ethanol and bioactive peptides producer yeasts, which can be exploited to valorize whey, in agreement with the principles of circularity and sustainability.

**Keywords:** Parmigiano Reggiano cheese; whey; natural whey starter; ethanol; bioactive peptide; yeasts;*Kluyveromyces marxianus*; *Wickerhamiella pararugosa*; *Torulaspora delbrueckii.*

**Supplementary Data**


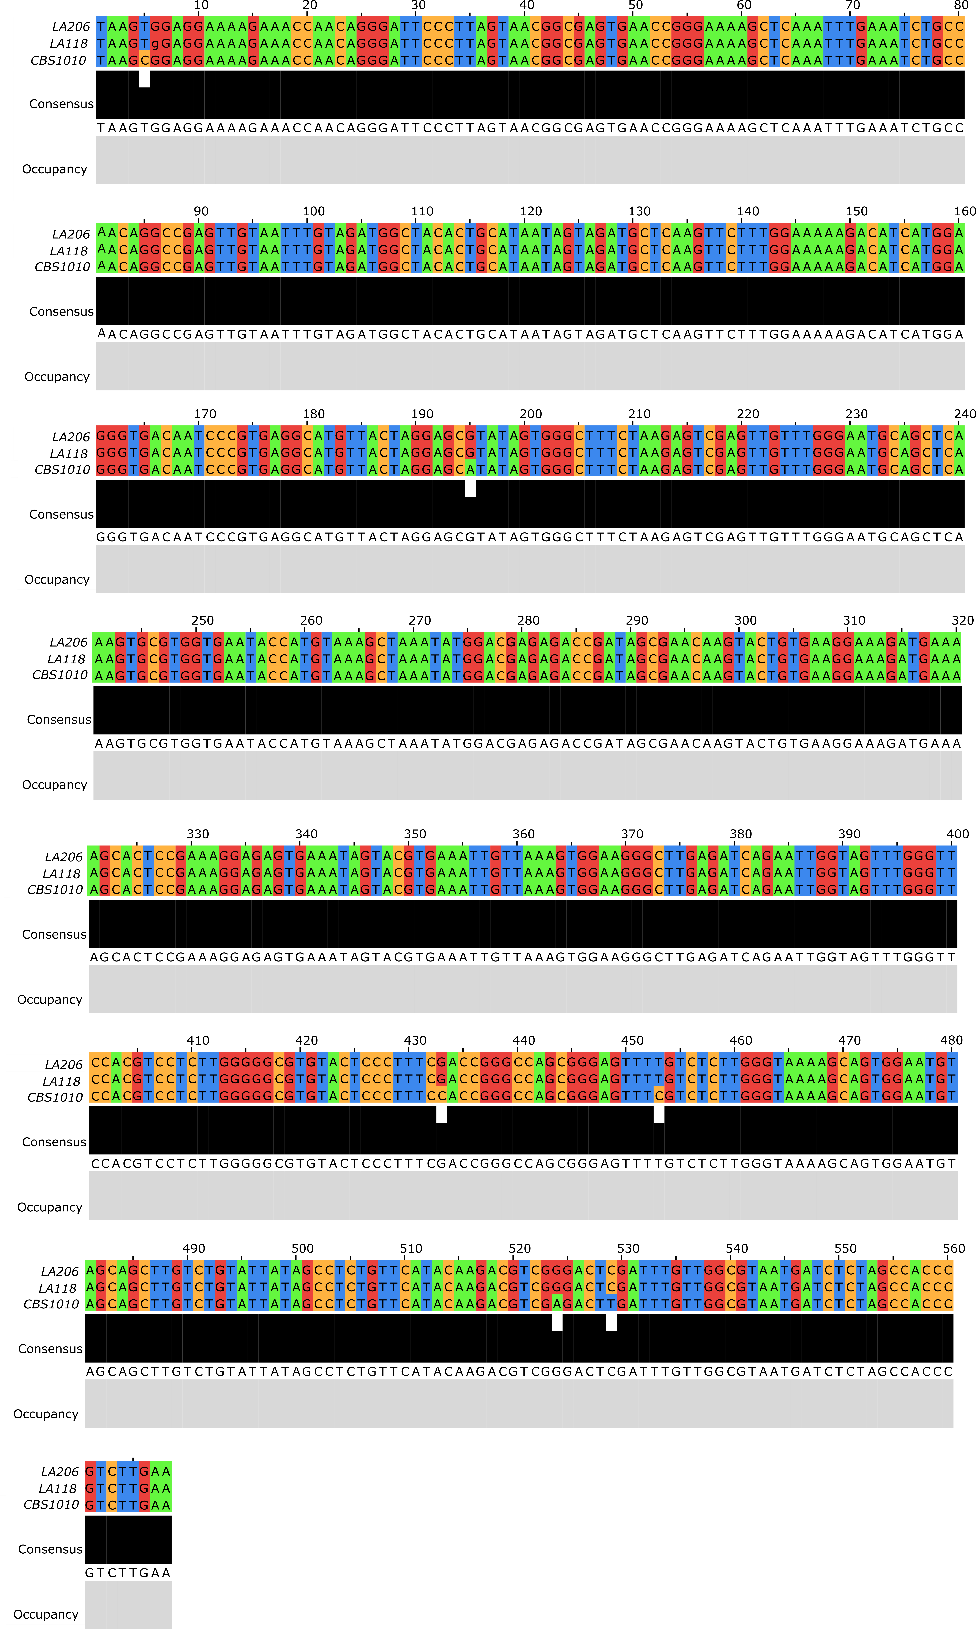


|  |  |
| --- | --- |

**Figure S1.** Multiple sequence alignment of 26S rRNA D1/D2 domain nucleotide sequences of *W. pararugosa* LA118 and LA206 with reference strain CBS1010T. Nucleotide sequences were aligned using Muscle program [1] in MEGA X software [2] and the resulting alignment was visualized using JalView v2.11 [3].

**Table S1**. Kinetic growth parameters of selected 12 *K. marxianus* strains, 2 *W. pararugosa* and 1 *T. delbrueckii* strain. Growth data obtained by gravimetric assays in whey were fitted with different mathematical models in Grofit [4] to calculate growth rate µ (h-1), growth efficiency A (maximum % of CO2 released), and lag phase (h). When available, for each strains *MAT* genotype and temperature score are reported. Data are represented as mean (n=3) ± standard deviation. Abbreviations: T, temperature; Km, *K. marxianus*; Wp, *W. pararugosa*; Td, *T. delbrueckii*; nd, not detected.

| **Species** | **Strains** | | **Mating type** | | **T score** | **Growth parameters** | | | | | | |
| --- | --- | --- | --- | --- | --- | --- | --- | --- | --- | --- | --- | --- |
| **Model** | | **µ** | | **A** | | **λ** |
| Km | CA104 | *MATa*/*MATα* | | 13 | | Richards | 0.0206 ±0.0009 | | 2.3614±0.0460 | | 25.1589±1.7176 | |
|  | CA105 | *MATα* | | 13 | | Richards | 0.0192±0.0009 | | 2.1657±0.3203 | | 67.7658±3.6328 | |
|  | CA111 | *MATa*/*MATα* | | 13 | | Gompertz | 0.0233±0.0047 | | 2.6124±0.2264 | | 15.10322.3275 | |
|  | CA116 | *MATa*/*MATα* | | 15 | | Richards | 0.0170±0.0002 | | 1.9749±0.6838 | | 69.2531±7.3062 | |
|  | CA204 | *MATa*/*MATα* | | 16 | | Richards | 0.0197±0.0009 | | 2.0128±0.4480 | | 31.8511±2.2288 | |
|  | CA207 | *MATa*/*MATα* | | 9 | | logistics | 0.0230±0.0004 | | 1.7240±0.1685 | | 45.4162±10.7960 | |
|  | CA213 | *MATa*/*MATα* | | 12 | | Richards | 0.0241±0.0006 | | 2.3682±0.3023 | | 30.8106±9.0832 | |
|  | CA214 | *MATa*/*MATα* | | 12 | | logistics | 0.0222±0.0018 | | 2.0853±0.4113 | | 35.1206±12.0657 | |
|  | LA102 | *MATα* | | 12 | | Gompertz | 0.0241±0.0011 | | 2.2359±0.3692 | | 19.0651±2.5031 | |
|  | LA202 | *MATα* | | 15 | | logistics | 0.0219±0.0019 | | 2.2831±0.0103 | | 78.8519±11.8921 | |
|  | LA210 | *MATα* | | 12 | | Gompertz | 0.0218±0.0008 | | 2.5022±0.3536 | | 21.2292±6.1693 | |
|  | RO101 | *MATa* | | 12 | | Richards | 0.0215±0.0022 | | 2.0656±0.2168 | | 43.9611±1.8880 | |
| Wp | LA118 | nd | | nd | | Gompertz | 0.0077±0.0000 | | 0.1493±0.0000 | | 3.434038±0.0000 | |
|  | LA218 | nd | | nd | | modified Gompertz | 0.007±0.00004 | | 0.4814±0.0000 | | 10.67506±0.0000 | |
| Td | RO204-3 | nd | | nd | | Gompertz | 0.0040±0.0021 | | 2.8294±0.3888 | | 326.5984±10.8513 | |

**Table S2.** β-casein-derived peptides identified after whey fermentation by selected yeast strains. Details on strain isolation are in Table 2.

| Peptide sequence | Fragment | *m/z* observed | *m/z* expected | ppm | Charge |  | CA105 | CA116 | CA214 | LA202 | RO101 | RO204-3 |
| --- | --- | --- | --- | --- | --- | --- | --- | --- | --- | --- | --- | --- |
| PGEIVE | 9-14 | 643.3300 | 643.3297 | -0.5 | 1 |  |  |  | X |  | X |  |
| SLSssEESITR | 15-25 | 678.2598 | 678.2600 | 0.3 | 2 |  |  |  | X | X |  |  |
| SLsssEESITR | 15-25 | 718.2449 | 718.2432 | -2.4 | 2 |  | X | X | X | X | X |  |
| sLsssEESITR | 15-25 | 758.2262 | 758.2263 | 0.1 | 2 |  |  |  | X | X | X |  |
| SLSssEESITRINK | 15-28 | 570.9159 | 570.9164 | 0.9 | 3 |  |  |  | X |  | X |  |
| SLsssEESITRINK | 15-28 | 895.8542 | 895.8542 | 0.0 | 2 and 3 |  | X | X | X |  | X | X |
| sLsssEESITRINK | 15-28 | 935.8392 | 935.8373 | -2.0 | 2 |  | X | X | X | X | X | X |
| SLsssEESITRINKK | 15-29 | 640.2699 | 640.2702 | 0.5 | 3 |  |  |  |  |  | X |  |
| sLsssEESITRINKK | 15-29 | 999.8848 | 999.8848 | 0.0 | 2 |  |  |  |  |  |  | X |
| sssEESITRINK | 17-28 | 795.7975 | 795.7961 | -1.8 | 2 |  |  |  |  |  | X |  |
| KKIEKFQsE | 28-36 | 608.8021 | 608.8023 | 0.3 | 2 |  |  | X |  |  | X |  |
| KIEKFQsEE | 29-37 | 609.2757 | 609.2761 | 0.7 | 2 |  |  |  |  |  | X |  |
| DELQ | 43-46 | 504.2277 | 504.2300 | 4.6 | 1 |  |  |  |  |  | X |  |
| ELQ | 44-46 | 389.2014 | 389.2031 | 4.4 | 1 |  |  |  |  |  | X |  |
| AQTQSLVYPFPGPIPN | 53-68 | 864.9530 | 864.9514 | -1.8 | 1 |  | X |  |  |  |  |  |
| SLVYPFPGP | 57-65 | 976.5151 | 976.5138 | -1.3 | 1 and 2 |  |  |  | X |  | X |  |
| SLVYPFPGPI | 57-66 | 545.3047 | 545.3026 | -3.9 | 2 |  | X |  |  |  |  |  |
| SLVYPFPGPIPN | 57-68 | 1300.6944 | 1300.6936 | -0.6 | 1 |  | X |  |  |  |  |  |
| VYPFPGPIPN | 59-68 | 1100.5787 | 1100.5775 | -1.1 | 1 |  | X | X |  | X | X |  |
| SLPQ | 69-72 | 444.2446 | 444.2453 | 1.6 | 1 |  |  |  | X |  |  |  |
| NIPPLTQTPVVVPP | 73-86 | 736.4298 | 736.4296 | -0.3 | 2 |  |  |  |  |  | X |  |
| NIPPLTQTPVVVPPF | 73-87 | 809.9645 | 809.9638 | -0.9 | 2 |  | X |  |  |  |  |  |
| IPPL | 74-77 | 439.2925 | 439.2915 | -2.3 | 1 |  | X |  |  |  |  |  |
| PPL | 75-77 | 326.2076 | 326.2074 | -0.6 | 1 |  |  | X |  |  |  |  |
| PPLTQTPV | 75-82 | 852.4809 | 852.4825 | 1.9 | 1 |  |  |  |  | X |  |  |
| PPLTQTPVVVPP | 75-86 | 622.8670 | 622.8661 | -1.4 | 2 |  |  |  | X |  | X |  |
| PPLTQTPVVVPPF | 75-87 | 696.4004 | 696.4003 | -0.1 | 2 |  | X |  |  |  |  |  |
| PVVVPP | 81-86 | 607.3817 | 607.3814 | -0.5 | 1 |  | X | X | X |  | X |  |
| PVVVPPF | 81-87 | 754.4492 | 754.4498 | 0.8 | 1 and 2 |  | X | X | X | X | X | X |
| PVVVPPFLQP | 81-90 | 1092.6431 | 1092.6452 | 1.9 | 1 and 2 |  | X |  |  |  |  |  |
| VVPP | 83-86 | 411.2597 | 411.2602 | 1.2 | 1 |  |  |  | X |  |  |  |
| VMGVSK | 92-97 | 310.6752 | 310.6754 | 0.6 | 2 |  |  |  | X |  | X | X |
| VSKVKEA | 95-101 | 380.7317 | 380.7318 | 0.3 | 2 |  |  |  |  | X |  |  |
| EAMAPK | 100-105 | 646.3225 | 646.3229 | 0.6 | 1 |  |  |  | X |  |  |  |
| AMAPK | 101-105 | 517.2801 | 517.2803 | 0.4 | 1 |  |  |  | X | X | X |  |
| APKHKEMPFPKYPVEPFT | 103-120 | 715.0393 | 715.0397 | 0.6 | 4 and 3 |  |  |  |  |  |  | X |
| LTD | 127-129 | 348.1761 | 348.1765 | 1.1 | 1 |  | X |  | X |  | X |  |
| TDV | 128-130 | 334.1603 | 334.1609 | 1.8 | 1 |  |  |  | X |  |  |  |
| DVENLHLPLP | 129-138 | 573.8141 | 573.8113 | -4.9 | 2 |  | X | X | X |  | X |  |
| VENLHLPLP | 130-138 | 516.2982 | 516.2978 | -0.8 | 2 |  | X | X | X |  | X |  |
| NLHLPLPLLQS | 132-142 | 622.8748 | 622.8717 | -5.0 | 2 |  | X |  |  |  |  |  |
| LHLPLP | 133-138 | 345.2207 | 345.2209 | 0.6 | 2 |  | X | X | X | X | X |  |
| LHLPLPLLQ | 133-141 | 522.3356 | 522.3342 | -2.7 | 2 |  | X |  |  |  |  |  |
| LHLPLPLLQS | 133-142 | 565.8508 | 565.8502 | -1.1 | 2 |  | X |  |  |  |  |  |
| MHQPHQPLPPT | 144-154 | 641.8222 | 641.8217 | -0.8 | 2 and 3 |  | X | X | X | X | X |  |
| MHQPHQPLPPTVMFPP | 144-159 | 618.6448 | 618.6445 | -0.5 | 3 |  |  |  | X |  | X |  |
| MHQPHQPLPPTVmFPP | 144-159 | 623.9769 | 623.9761 | -1.3 | 3 |  |  | X |  |  |  |  |
| HQPHQPLPPT | 145-154 | 576.3020 | 576.3014 | -1.0 | 2 |  | X | X |  |  |  |  |
| HQPHQPLPPTVMFPP | 145-159 | 574.9644 | 574.9643 | -0.2 | 3 |  |  |  |  | X |  |  |
| LPPT | 151-154 | 427.2534 | 427.2551 | 4.0 | 1 |  |  |  |  |  |  | X |
| TVm | 154-156 | 366.1694 | 366.1693 | -0.3 | 1 |  | X |  |  |  |  |  |
| SLSQSKVLPVP | 164-174 | 577.8436 | 577.8426 | -1.7 | 2 |  |  |  | X |  | X |  |
| SLSQSKVLPVPQ | 164-175 | 641.8722 | 641.8719 | -0.5 | 2 |  | X | X |  | X | X | X |
| SLSQSKVLPVPQKAVPYPQ | 164-182 | 689.3940 | 689.3930 | -1.5 | 3 |  |  | X |  |  |  | X |
| SLSQSKVLPVPQKAVPYPQR | 164-183 | 556.3224 | 556.3218 | -1.1 | 4 |  | X | X |  | X |  | X |
| SLSQSKVLPVPQKAVPYPQRDMPI | 164-187 | 670.3743 | 670.3729 | -2.1 | 4 |  |  | X |  |  |  |  |
| SLSQSKVLPVPQKAVPYPQRDMPIQ | 164-188 | 936.1814 | 936.1810 | -0.4 | 3 |  |  |  |  |  |  | X |
| SQSKVLPVP | 166-174 | 954.5622 | 954.5619 | -0.3 | 1 |  |  |  | X |  | X |  |
| SQSKVLPVPQ | 166-175 | 541.8137 | 541.8139 | 0.4 | 2 |  | X | X | X | X | X | X |
| SQSKVLPVPQK | 166-176 | 605.8611 | 605.8613 | 0.3 | 2 |  | X |  | X | X | X |  |
| SQSKVLPVPQKAVPYPQ | 166-182 | 622.6869 | 622.6876 | 1.1 | 2 and 3 |  |  |  |  |  |  | X |
| SQSKVLPVPQKAVPYPQR | 166-183 | 506.2928 | 506.2928 | 0.0 | 3 and 4 |  | X | X |  | X |  |  |
| SQSKVLPVPQKAVPYPQRDMP | 166-186 | 592.0749 | 592.0729 | -3.4 | 4 |  |  |  |  |  | X |  |
| SKVLPVP | 168-174 | 739.4700 | 739.4713 | 1.8 | 1 |  |  |  | X |  |  |  |
| SKVLPVPQ | 168-175 | 867.5309 | 867.5298 | -1.3 | 1 |  |  |  | X |  | X |  |
| SKVLPVPQK | 168-176 | 498.3161 | 498.3160 | -0.2 | 2 |  |  |  |  |  | X |  |
| KVLPVP | 169-174 | 652.4377 | 652.4392 | 2.3 | 1 and 2 |  |  |  | X |  | X |  |
| KVLPVPQ | 169-175 | 780.4978 | 780.4978 | 0.0 | 1 |  | X |  | X |  | X |  |
| KAVPYP | 176-181 | 674.3879 | 674.3872 | -1.0 | 1 |  | X |  |  |  |  |  |
| KAVPYPQ | 176-182 | 802.4453 | 802.4458 | 0.6 | 1 |  | X | X | X | X | X |  |
| KAVPYPQR | 176-183 | 479.7782 | 479.7771 | -2.3 | 2 |  | X | X | X | X | X |  |
| LYQEPVLGPVRGPFP | 192-206 | 834.9592 | 834.9590 | -0.2 | 2 |  |  |  |  |  | X |  |
| YQEPVLGPVR | 193-202 | 579.3149 | 579.3139 | -1.7 | 2 |  | X |  | X | X | X |  |
| YQEPVLGPVRGPF | 193-205 | 486.9296 | 486.9295 | -0.2 | 2 |  | X |  | X |  | X |  |
| YQEPVLGPVRGPFP | 193-206 | 778.4170 | 778.4170 | 0.0 | 2 |  | X | X |  | X | X |  |
| GPVRGPFP | 199-206 | 413.7315 | 413.7321 | 1.5 | 2 |  | X | X | X | X | X |  |
| GPVRGPFPI | 199-207 | 470.2746 | 470.2742 | -0.9 | 2 |  |  | X |  |  | X |  |
| GPVRGPFPII | 199-208 | 526.8174 | 526.8162 | -2.3 | 2 |  |  |  |  |  | X | X |
| IIV | 207-209 | 344.2546 | 344.2544 | -0.6 | 1 |  | X | X | X | X | X |  |

| **Table S3**. αS1-casein-derived peptides identified after whey fermentation by selected yeast strains. Details on strain isolation are in Table 2. | | | | | | | | | | | | |
| --- | --- | --- | --- | --- | --- | --- | --- | --- | --- | --- | --- | --- |
|  |  |  |  |  |  |  |  |  |  |  |  |  |
| **Peptide sequence** | **Fragment** | ***m/z* observed** | ***m/z* expected** | **ppm** | **Charge** |  | **CA105** | **CA116** | **CA214** | **LA202** | **RO101** | **RO204-3** |
| RPKHPIKH | 1-8 | 338.2100 | 338.2103 | 0.9 | 3 |  |  |  | **X** |  |  |  |
| RPKHPIKHQ | 1-9 | 380.8963 | 380.8965 | 0.5 | 3 |  | **X** |  | **X** | **X** |  | **X** |
| RPKHPIKHQGLPQEV | 1-15 | 441.7562 | 441.7561 | -0.2 | 4 |  |  | **X** |  |  |  |  |
| RPKHPIKHQGLPQEVL | 1-16 | 470.0269 | 470.0272 | 0.6 | 4 and 5 |  |  |  |  |  |  | **X** |
| LLR | 20-22 | 401.2866 | 401.2871 | 1.2 | 1 |  |  |  | **X** | **X** | **X** |  |
| LSKDIGsEsTEDQ | 40-52 | 784.7913 | 784.7919 | 0.8 | 2 |  |  |  |  |  | **X** |  |
| SKDIGsEsTE | 41-50 | 606.7067 | 606.7071 | 0.7 | 2 |  |  |  | **X** | **X** |  |  |
| sKDIGsEsTE | 41-50 | 646.6900 | 646.6902 | 0.3 | 2 |  |  |  |  | **X** |  |  |
| SKDIGsEsTED | 41-51 | 664.2193 | 664.2206 | 2.0 | 2 |  |  |  | **X** |  | **X** |  |
| SKDIGsEStED | 41-51 | 664.2195 | 664.2206 | 1.7 | 2 |  |  |  |  |  |  |  |
| SKDIGsEsTEDQ | 41-52 | 728.2496 | 728.2498 | 0.3 | 2 |  | **X** | **X** | **X** | **X** | **X** |  |
| sKDIGsEsTEDQ | 41-52 | 768.2322 | 768.2330 | 1.0 | 2 |  |  |  |  |  |  |  |
| SKDIGsEsTEDQA | 41-53 | 763.7695 | 763.7684 | -1.4 | 2 |  | **X** | **X** | **X** | **X** | **X** |  |
| IGsEsTEDQ | 44-52 | 563.1722 | 563.1729 | 1.2 | 2 |  |  |  |  | **X** |  |  |
| DQAMEDIKQ | 51-59 | 539.2471 | 539.2477 | 1.1 | 2 |  |  |  |  |  | **X** |  |
| DIK | 56-58 | 375.2233 | 375.2238 | 1.3 | 1 |  |  |  |  |  | **X** | **X** |
| sVEQKHIQ | 75-82 | 524.7439 | 524.7448 | 1.7 | 2 |  | **X** |  | **X** |  | **X** |  |
| sVEQKHIQK | 75-83 | 588.7920 | 588.7923 | 0.5 | 2 |  |  | **X** |  |  |  |  |
| HIQ | 80-82 | 397.2186 | 397.2194 | 2.0 | 1 |  |  |  | **X** |  | **X** | **X** |
| LRLKKYKVPQ | 99-108 | 424.9426 | 424.9432 | 1.4 | 3 |  | **X** | **X** |  | **X** |  | **X** |
| LRLKKYKVPQL | 99-109 | 347.2304 | 347.2302 | -0.6 | 4 |  |  | **X** |  | **X** |  | **X** |
| LRLKKYKVPQLEIVPN | 99-114 | 646.7342 | 646.7348 | 0.9 | 3 and 4 |  |  | **X** |  | **X** |  | **X** |
| LRLKKYKVPQLEIVPNsAEERLH | 99-122 | 568.9167 | 568.9167 | 0.0 | 5 |  |  |  |  |  |  | **X** |
| LRLKKYKVPQLEIVPNsAEERLHSMKEGIHAQ | 99-130 | 637.8435 | 637.8435 | 0.0 | 6 |  |  |  |  |  |  | **X** |
| LRLKKYKVPQLEIVPNsAEERLHSMKEGIHAQQKEPMIGVNQEL | 99-142 | 742.1083 | 742.1086 | 0.4 | 7 |  |  |  |  |  |  | **X** |
| RLKKYKVPQ | 100-108 | 387.2484 | 387.2485 | 0.3 | 2 and 3 |  | **X** | **X** |  | **X** | **X** |  |
| RLKKYKVPQL | 100-109 | 318.9603 | 318.9592 | -3.4 | 4 |  |  |  |  | **X** |  |  |
| KKYKVPQ | 102-108 | 445.7763 | 445.7765 | 0.4 | 2 |  | **X** | **X** | **X** |  | **X** |  |
| KKYKVPQLEIVPN | 102-114 | 389.7360 | 389.7356 | -1.0 | 4 |  |  |  |  |  |  | **X** |
| LEIVPN | 109-114 | 684.3916 | 684.3927 | 1.6 | 1 |  |  |  |  | **X** | **X** | **X** |
| KEGIHAQQK | 124-132 | 519.7874 | 519.7882 | 1.5 | 2 |  | **X** | **X** |  |  | **X** |  |
| sAEER | 115-119 | 336.1229 | 336.1234 | 1.5 | 2 |  |  |  | **X** |  |  |  |
| PMI | 134-136 | 360.1935 | 360.1952 | 4.7 | 1 |  |  |  |  |  |  | **X** |
| PEL | 147-149 | 358.1959 | 358.1973 | 3.9 | 1 |  |  |  |  |  |  | **X** |
| YYV | 165-167 | 444.2135 | 444.2129 | -1.4 | 1 |  |  |  | **X** | **X** |  |  |
| APSFSDIPNPIGSEN | 176-190 | 772.8647 | 772.8650 | 0.4 | 2 |  |  |  | **X** |  |  |  |
| APSFSDIPNPIGSENSEK | 176-193 | 944.9503 | 944.9498 | -0.5 | 2 |  |  |  | **X** |  | **X** |  |
| SFSDIPNPIGSENSE | 178-192 | 796.8569 | 796.8574 | 0.6 | 2 |  |  |  | **X** |  |  |  |
| FSDIPNPIG | 179-187 | 480.2458 | 480.2453 | -1.0 | 2 |  | **X** |  | **X** |  |  | **X** |
| FSDIPNPIGSE | 179-189 | 588.2843 | 588.2826 | -2.9 | 2 |  |  | **X** |  | **X** |  |  |
| FSDIPNPIGSENSE | 179-192 | 753.3406 | 753.3414 | 1.1 | 2 |  | **X** | **X** |  | **X** | **X** | **X** |
| FSDIPNPIGSENSEK | 179-193 | 817.3906 | 817.3888 | -2.2 | 2 |  |  | **X** |  |  |  | **X** |
| SDIPNPIGSENSE | 180-192 | 679.8064 | 679.8072 | 1.2 | 2 |  |  |  |  | **X** |  |  |
| SDIPNPIGSENSEK | 180-193 | 743.8548 | 743.8546 | -0.3 | 2 |  |  |  |  |  |  | **X** |
| IPNPIGSEN | 182-190 | 470.7412 | 470.7404 | -1.7 | 2 |  | **X** |  |  |  |  |  |
| IPNPIGSENSE | 182-192 | 578.7783 | 578.7777 | -1.0 | 2 |  | **X** |  |  | **X** |  |  |

| **Table S4**. αS2-casein-derived peptides identified after whey fermentation by selected yeast strains. Details on strain isolation are in Table 2. | | | | | | | | | | | | |
| --- | --- | --- | --- | --- | --- | --- | --- | --- | --- | --- | --- | --- |
|  |  |  |  |  |  |  |  |  |  |  |  |  |
| **Peptide sequence** | **Fragment** | ***m/z* observed** | ***m/z* expected** | **ppm** | **Charge** |  | **CA105** | **CA116** | **CA214** | **LA202** | **RO101** | **RO204-3** |
| SIIsQETYK | 13-21 | 574.7645 | 574.7654 | 1.6 | 2 |  |  |  | **X** |  |  |  |
| AINPsKENL | 27-35 | 533.2531 | 533.2524 | -1.3 | 2 |  |  |  | **X** |  |  |  |
| YSI | 52-54 | 382.1975 | 382.1973 | -0.5 | 1 |  |  |  |  |  |  | **X** |
| YLYQGPIVLNPWDQVKR | 98-114 | 697.0474 | 697.0458 | -2.3 | 3 |  |  | **X** | **X** |  | **X** |  |
| LYQGPIVLNPWDQVKR | 99-114 | 963.5336 | 963.5334 | -0.2 | 2. 3 and 4 |  | **X** | **X** | **X** | **X** | **X** | **X** |
| YQGPIVLNPWDQVK | 100-113 | 828.9404 | 828.9408 | 0.5 | 2 |  | **X** |  |  |  | **X** |  |
| YQGPIVLNPWDQVKR | 100-114 | 906.9917 | 906.9914 | -0.3 | 2 and 3 |  | **X** | **X** | **X** | **X** | **X** | **X** |
| QGPIVLNPWDQVK | 101-113 | 747.4103 | 747.4092 | -1.5 | 2 |  |  |  |  |  |  |  |
| QGPIVLNPWDQVKR | 101-114 | 550.6424 | 550.6423 | -0.2 | 3 |  |  |  | **X** | **X** |  |  |
| RNAVPITPT | 114-122 | 484.7813 | 484.7798 | -3.1 | 2 |  |  | **X** |  |  |  |  |
| NAVPITPTLNR | 115-125 | 598.3433 | 598.3433 | 0.0 | 2 |  | **X** | **X** | **X** | **X** | **X** |  |
| NAVPITPTLNRE | 115-126 | 662.8637 | 662.8646 | 1.4 | 2 |  | **X** | **X** | **X** | **X** | **X** |  |
| NAVPITPtLNREQLSTsEENSKKTVDMEsTEVF  TKKTKLTEEEKNRLNF | 115-163 | 842.9743 | 842.9755 | 1.4 | 7 |  |  |  |  |  |  |  |
| AVPITPTLNR | 116-125 | 541.3234 | 541.3218 | -3.0 | 2 |  | **X** |  | **X** | **X** | **X** |  |
| AVPITPTLNRE | 116-126 | 605.8429 | 605.8431 | 0.3 | 2 |  |  |  | **X** |  |  |  |
| PITP | 118-121 | 427.2534 | 427.2551 | 4.0 | 1 |  |  |  |  |  |  | **X** |
| NREQLsTsEE | 124-133 | 676.7419 | 676.7420 | 0.1 | 2 |  |  |  | **X** |  |  |  |
| YLK | 179-181 | 423.2607 | 423.2602 | -1.2 | 1 |  | **X** | **X** | **X** |  | **X** | **X** |
| TKVIPYVR | 198-205 | 325.8712 | 325.8710 | -0.6 | 3 |  | **X** | **X** |  |  |  |  |
| YVRY | 203-206 | 600.3153 | 600.3140 | -2.2 | 1 |  |  |  |  | **X** |  |  |

| **Table S5**. κ-casein-derived peptides identified after whey fermentation by selected yeast strains. Details on strain isolation are in Table 2. | | | | | | | | | | | | |
| --- | --- | --- | --- | --- | --- | --- | --- | --- | --- | --- | --- | --- |
|  | | | | | | | | | | | | |
| **Peptide sequence** | **Fragment** | ***m/z* observed** | ***m/z* expected** | **ppm** | **Charge** |  | **CA105** | **CA116** | **CA214** | **LA202** | **RO101** | **RO204-3** |
| KYIPIQYVL | 30-38 | 568.8385 | 568.8393 | 1.4 | 2 |  |  |  |  |  |  | **X** |
| YGL | 44-46 | 718.2449 | 718.2432 | -2.4 | 2 |  | **X** |  |  |  | **X** |  |
| PVALINN | 53-59 | 740.4292 | 740.4301 | 1.2 | 1 |  |  |  | **X** |  | **X** |  |
| FLPYPYYAKPA | 61-71 | 665.3473 | 665.3475 | 0.3 | 2 |  |  |  |  |  | **X** |  |
| AVRSPA | 72-77 | 300.6766 | 300.6768 | 0.7 | 2 |  |  |  | **X** |  | **X** |  |
| AVRSPAQ | 72-78 | 364.7059 | 364.7061 | 0.5 | 2 |  |  |  | **X** |  |  |  |
| AVRSPAQI | 72-79 | 421.2485 | 421.2482 | -0.7 | 2 |  | **X** |  | **X** | **X** | **X** |  |
| AVRSPAQIL | 72-80 | 477.7898 | 477.7902 | 0.8 | 2 |  |  |  |  | **X** |  |  |
| SNTVPAK | 86-92 | 358.7003 | 358.7005 | 0.6 | 2 |  |  |  | **X** |  |  |  |
| MAIPPKKNQ | 112-120 | 342.8637 | 342.8637 | 0.0 | 2 and 3 |  | **X** | **X** | **X** | **X** | **X** | **X** |
| MAIPPKKNQD | 112-121 | 571.3056 | 571.3053 | -0.5 | 2 and 3 |  | **X** | **X** | **X** | **X** | **X** | **X** |
| MAIPPKKNQDK | 112-122 | 635.3530 | 635.3528 | -0.3 | 2 and 3 |  | **X** | **X** | **X** | **X** | **X** | **X** |
| AIPPKKNQDK | 113-122 | 569.8315 | 569.8326 | 1.9 | 2 |  |  | **X** |  |  | **X** |  |
| PPKKNQDK | 115-122 | 477.7714 | 477.7720 | 1.3 | 2 |  | **X** | **X** | **X** |  | **X** |  |
| DKTEIPTINT | 121-130 | 566.2986 | 566.2982 | -0.7 | 2 |  | **X** |  | **X** |  | **X** | **X** |
| KTEIPTIN | 122-129 | 915.5132 | 915.5146 | 1.5 | 1 |  |  |  | **X** |  | **X** |  |
| TEI | 123-125 | 362.1917 | 362.1922 | 1.4 | 1 |  |  |  | **X** |  |  |  |
| TEIPTIN | 123-129 | 787.4177 | 787.4196 | 2.4 | 1 |  | **X** |  |  |  | **X** |  |
| TIASGE | 130-135 | 577.2818 | 577.2828 | 1.7 | 1 |  |  |  | **X** |  |  |  |
| TIAsGEPT | 130-137 | 855.3493 | 855.3496 | 0.4 | 1 |  | **X** | **X** |  | **X** | **X** | **X** |
| TIAsGEPTSTPT | 130-141 | 1241.5314 | 1241.5297 | -1.4 | 1 |  |  | **X** |  | **X** | **X** |  |
| TIASGEPTSTPTTE | 130-143 | 1391.6528 | 1391.6536 | 0.6 | 1 |  |  |  |  |  | **X** |  |
| TIAsGEPTSTPTTE | 130-143 | 736.3129 | 736.3136 | 1.0 | 2 |  |  |  |  |  | **X** |  |
| TIASGEPTSTPTTEAVESTVATLEDsPE | 130-157 | 967.4340 | 967.4322 | -1.9 | 3 |  |  |  |  |  | **X** |  |
| GEPTSTPTTE | 134-143 | 1019.4517 | 1019.4528 | 1.1 | 1 |  |  |  | **X** | **X** |  |  |
| STPTTE | 138-143 | 635.2872 | 635.2883 | 1.7 | 1 |  |  |  |  | **X** | **X** |  |
| AVESTVAtL | 144-152 | 970.4490 | 970.4493 | 0.3 | 1 |  |  |  |  |  | **X** |  |
| AVESTVATLEDsP | 144-156 | 699.8041 | 699.8054 | 1.9 | 2 |  |  |  |  |  | **X** |  |
| AVEStVATLEDSPE | 144-157 | 1527.6467 | 1527.6462 | -0.3 | 1 |  |  |  |  |  | **X** |  |
| AVESTVATLEDsPE | 144-157 | 764.3280 | 764.3267 | -1.7 | 2 |  |  |  |  |  | **X** |  |
| AVEStVATLEDsPE | 144-157 | 804.3109 | 804.3099 | -1.2 | 2 |  |  |  |  |  | **X** |  |
| VESTVAtL | 145-152 | 450.2102 | 450.2097 | -1.1 | 2 |  |  |  | **X** |  | **X** |  |
| VESTVATLEDsPE | 145-157 | 728.8079 | 728.8082 | 0.4 | 2 |  |  |  |  |  | **X** |  |
| STVATLEDsP | 147-156 | 550.2322 | 550.2314 | -1.5 | 2 |  |  |  |  |  | **X** |  |
| STVATLEDsPE | 147-157 | 614.7537 | 614.7527 | -1.6 | 3 |  | **X** |  | **X** | **X** | **X** |  |
| STVAtLEDsPE | 147-157 | 654.7380 | 654.7358 | -3.4 | 2 |  | **X** |  | **X** | **X** | **X** |  |
| TVATLEDsPE | 148-157 | 571.2373 | 571.2367 | -1.1 | 2 |  |  |  | **X** |  | **X** |  |
| VATLEDsPE | 149-157 | 1040.4160 | 1040.4184 | 2.3 | 1 and 2 |  |  |  | **X** |  | **X** |  |
| TLEDsPE | 151-157 | 870.3108 | 870.3128 | 2.3 | 1 |  |  |  | **X** |  | **X** |  |
| sPEVIESPP | 155-163 | 1034.4446 | 1034.4442 | -0.4 | 1 |  |  |  |  |  | **X** |  |
| sPEVIESPPEI | 155-165 | 638.7897 | 638.7891 | -0.9 | 2 |  |  |  |  |  | **X** |  |
| VIESPPEIN | 158-166 | 499.2644 | 499.2637 | -1.4 | 2 |  |  | **X** | **X** | **X** |  |  |
| SPPEIN | 161-166 | 328.6655 | 328.6661 | 1.8 | 2 |  |  |  | **X** |  | **X** |  |
| SPPEINT | 161-167 | 757.3737 | 757.3727 | -1.3 | 1 |  | **X** |  | **X** | **X** |  |  |
| PEI | 163-175 | 358.1959 | 358.1973 | 3.9 | 1 |  |  |  |  |  |  | **X** |

| **Table S6**. α-lactalbumin-derived peptides identified after whey fermentation by selected yeast strains. Details on strain isolation are in Table 2. | | | | | | | | | | | | |
| --- | --- | --- | --- | --- | --- | --- | --- | --- | --- | --- | --- | --- |
|  | | | | | | | | | | | | |
| **Peptide sequence** | **Fragment** | ***m/z* observed** | ***m/z* expected** | **ppm** | **Charge** |  | **CA105** | **CA116** | **CA214** | **LA202** | **RO101** | **RO204-3** |
| LTK | 7-9 | 361.2440 | 361.2445 | 1.4 | 1 |  |  |  | **X** |  | **X** |  |
| TKCEVFR | 8-14 | 441.7285 | 441.7287 | 0.5 | 2 |  |  |  |  | **X** |  |  |
| RELKDLKGYGGVSLPE | 14-29 | 587.6575 | 587.6562 | -2.2 | 3 and 4 |  |  | **X** |  |  |  | **X** |
| ELKDLKGYGG | 15-24 | 540.2909 | 540.2902 | -1.3 | 2 |  |  |  |  |  | **X** |  |
| ELKDLKGYGGVSLPE | 15-29 | 802.9291 | 802.9301 | 1.2 | 2 and 3 |  | **X** | **X** |  |  |  |  |
| KDLKGY | 17-22 | 362.2047 | 362.2054 | 1.9 | 2 |  | **X** |  |  |  |  |  |
| KDLKGYGGVS | 17-26 | 512.2777 | 512.2771 | -1.2 | 2 |  | **X** | **X** | **X** | **X** | **X** |  |
| KDLKGYGGVSL | 17-27 | 379.5489 | 379.5485 | -1.1 | 3 |  | **X** |  |  |  |  |  |
| KDLKGYGGVSLP | 17-28 | 411.9002 | 411.8994 | -1.9 | 2 and 3 |  | **X** | **X** | **X** | **X** | **X** |  |
| KDLKGYGGVSLPE | 17-29 | 454.9143 | 454.9136 | -1.5 | 2 and 3 |  | **X** | **X** | **X** | **X** | **X** | **X** |
| DLK | 18-20 | 375.2233 | 375.2238 | 1.3 | 1 |  |  |  |  |  | **X** | **X** |
| DLKGYGG | 18-24 | 355.1796 | 355.1794 | -0.6 | 2 |  | **X** |  |  | **X** | **X** |  |
| DLKGYGGVSLP | 18-28 | 553.3002 | 553.2980 | -4.0 | 2 |  | **X** | **X** | **X** | **X** | **X** |  |
| DLKGYGGVSLPE | 18-29 | 617.8192 | 617.8193 | 0.2 | 2 |  | **X** | **X** | **X** | **X** | **X** | **X** |
| KGYGGVS | 20-26 | 667.3404 | 667.3410 | 0.9 | 1 |  | **X** |  | **X** |  | **X** |  |
| KGYGGVSLPE | 20-29 | 503.7634 | 503.7639 | 0.9 | 2 |  | **X** | **X** |  | **X** |  |  |
| FHTSGYDT | 35-42 | 464.1959 | 464.1958 | -0.2 | 2 |  | **X** |  |  |  |  |  |
| FHTSGYDTQ | 35-43 | 528.2257 | 528.2251 | -1.1 | 2 |  |  | **X** | **X** | **X** | **X** |  |
| IVQNNDSTEYGL | 45-56 | 676.8218 | 676.8201 | -2.5 | 2 |  |  |  |  |  |  | **X** |
| YGL | 54-56 | 352.1875 | 352.1867 | -2.3 | 1 |  | **X** |  |  |  | **X** |  |
| LDD | 85-87 | 362.1551 | 362.1558 | 1.9 | 1 |  | **X** | **X** |  | **X** |  | **X** |
| LTD | 89-91 | 348.1761 | 348.1765 | 1.1 | 1 |  | **X** |  | **X** |  | **X** |  |
| KKIL | 97-100 | 501.3756 | 501.3759 | 0.6 | 1 |  |  | **X** |  |  |  |  |
| ILD | 99-101 | 360.2131 | 360.2129 | -0.6 | 1 |  | **X** | **X** | **X** | **X** | **X** | **X** |
| LDK | 100-102 | 375.2240 | 375.2238 | -0.5 | 1 |  | **X** |  |  | **X** | **X** | **X** |
| DKVGINY | 101-107 | 808.4184 | 808.4199 | 1.9 | 1 |  |  |  | **X** |  | **X** |  |
| DKVGINYW | 101-108 | 497.7530 | 497.7533 | 0.6 | 2 |  |  |  |  | **X** |  |  |
| KVGINYW | 102-108 | 440.2388 | 440.2398 | 2.3 | 2 |  |  |  | **X** | **X** |  |  |
| VGINYWLAHKA | 103-113 | 424.5687 | 424.5680 | -1.6 | 3 |  |  | **X** |  |  |  |  |
| LAH | 109-111 | 340.1972 | 340.1979 | 2.1 | 1 |  |  |  | **X** | **X** |  |  |
| KLDQ | 118-121 | 503.2803 | 503.2824 | 4.2 | 1 |  |  |  |  |  |  | **X** |

| **Table S7**. β-lactoglobulin-derived peptides identified after whey fermentation by selected yeast strains. Details on strain isolation are in Table 2. | | | | | | | | | | | | |
| --- | --- | --- | --- | --- | --- | --- | --- | --- | --- | --- | --- | --- |
|  | | | | | | | | | | | | |
| **Peptide sequence** | **Fragment** | ***m/z* observed** | ***m/z* expected** | **ppm** | **Charge** |  | **CA105** | **CA116** | **CA214** | **LA202** | **RO101** | **RO204-3** |
| LIV | 2-4 | 344.2546 | 344.2544 | -0.6 | 1 |  | **X** | **X** | **X** | **X** | **X** |  |
| LIVTQ | 2-6 | 573.3606 | 573.3606 | 0.0 | 1 |  | **X** |  |  |  |  |  |
| LIVTQTMK | 2-9 | 933.5435 | 933.5438 | 0.3 | 1 and 2 |  | **X** | **X** | **X** | **X** | **X** | **X** |
| LIVTQTMKG | 2-10 | 495.7869 | 495.7863 | -1.2 | 2 |  | **X** | **X** | **X** |  |  |  |
| LIVTQTMKGL | 2-11 | 552.3286 | 552.3283 | -0.5 | 2 |  | **X** | **X** | **X** | **X** | **X** |  |
| LIVTQTMKGLD | 2-12 | 609.8426 | 609.8418 | -1.3 | 2 |  | **X** |  | **X** | **X** | **X** |  |
| LIVTQTMKGLDIQ | 2-14 | 730.4143 | 730.4131 | -1.6 | 2 |  |  | **X** |  |  | **X** |  |
| LIVTQTMKGLDIQK | 2-15 | 794.4595 | 794.4606 | 1.4 | 2 and 3 |  |  |  |  |  |  | **X** |
| LIVTQTmKGLDIQKVAGTW | 2-20 | 706.7270 | 706.7258 | -1.7 | 3 |  | **X** | **X** |  |  |  | **X** |
| KGL | 9-11 | 317.2185 | 317.2183 | -0.6 | 1 |  | **X** | **X** | **X** | **X** | **X** |  |
| KGLDIQKVAGTW | 9-20 | 439.2506 | 439.2505 | -0.2 | 3 |  |  | **X** |  |  |  |  |
| LDI | 11-13 | 360.2128 | 360.2129 | 0.3 | 1 |  |  |  |  |  | **X** |  |
| YSL | 21-23 | 382.1975 | 382.1973 | -0.5 | 1 |  |  |  |  |  |  | **X** |
| AMAASDISL | 24-32 | 439.7176 | 439.7180 | 0.9 | 2 |  |  |  |  |  |  | **X** |
| AmAASDISLLDAQSAPLRVY | 24-43 | 703.3625 | 703.3613 | -1.7 | 3 |  |  |  |  |  |  | **X** |
| SDISLLDAQSAPLRV | 28-42 | 792.9347 | 792.9332 | -1.9 | 2 |  |  |  |  |  |  | **X** |
| SDISLLDAQSAPLRVY | 28-43 | 874.4660 | 874.4649 | -1.3 | 2 and 3 |  |  |  |  |  |  | **X** |
| ISLL | 30-33 | 445.3024 | 445.3021 | -0.7 | 1 |  |  |  |  |  | **X** |  |
| ISLLDAQSAPLRV | 30-42 | 691.9055 | 691.9037 | -2.6 | 2 |  |  |  |  |  |  | **X** |
| ISLLDAQSAPLRVY | 30-43 | 773.4354 | 773.4354 | 0.0 | 2 |  |  |  |  |  |  | **X** |
| LLDAQSAPLRVY | 32-43 | 673.3780 | 673.3774 | -0.9 | 2 |  |  |  |  |  |  | **X** |
| LDAQSAPLRVY | 33-43 | 616.8360 | 616.8353 | -1.1 | 2 |  |  | **X** |  |  |  | **X** |
| LDAQSAPLRVYVE | 33-45 | 730.8909 | 730.8908 | -0.1 | 2 |  |  |  |  |  |  | **X** |
| DAQSAPLRV | 34-42 | 478.7625 | 478.7616 | -1.9 | 2 |  |  | **X** |  |  | **X** | **X** |
| DAQSAPLRVYVE | 34-45 | 674.3496 | 674.3488 | -1.2 | 2 |  | **X** | **X** |  | **X** | **X** |  |
| AQSAPLR | 35-41 | 371.7136 | 371.7139 | 0.8 | 2 |  | **X** |  |  |  |  |  |
| AQSAPLRV | 35-42 | 421.2496 | 421.2482 | -3.3 | 2 |  | **X** |  |  |  | **X** |  |
| AQSAPLRVY | 35-42 | 502.7804 | 502.7798 | -1.2 | 2 |  | **X** | **X** |  | **X** |  | **X** |
| AQSAPLRVYVE | 35-44 | 616.8373 | 616.8353 | -3.2 | 2 |  | **X** | **X** | **X** | **X** | **X** | **X** |
| YVEELKPTPE | 42-52 | 602.8094 | 602.8084 | -1.7 | 2 |  |  |  |  |  | **X** |  |
| YVEELKPTPEGDLEIL | 42-58 | 922.9819 | 922.9800 | -2.1 | 2 |  |  |  |  |  |  | **X** |
| VEELKPTPE | 44-52 | 521.2761 | 521.2768 | 1.3 | 2 |  | **X** | **X** |  | **X** |  |  |
| VEELKPTPEGDLEIL | 44-58 | 841.4501 | 841.4484 | -2.0 | 2 and 3 |  |  |  |  |  |  | **X** |
| KPT | 47-49 | 345.2129 | 345.2132 | 0.9 | 1 |  |  |  |  |  |  |  |
| KKII | 70-73 | 501.3756 | 501.3759 | 0.6 | 1 |  |  | **X** |  |  |  |  |
| IAE | 73-75 | 332.1808 | 332.1816 | 2.4 | 1 |  |  |  | **X** |  |  |  |
| KTKIPAVFK | 76-84 | 516.3357 | 516.3342 | -2.9 | 2 and 3 |  | **X** | **X** | **X** | **X** | **X** | **X** |
| KTKIPAVFKI | 76-85 | 382.2538 | 382.2533 | -1.3 | 3 |  | **X** | **X** |  |  |  |  |
| KTKIPAVFKID | 76-86 | 420.5964 | 420.5956 | -1.9 | 3 |  | **X** | **X** | **X** | **X** | **X** |  |
| AVF | 81-83 | 336.1923 | 336.1918 | -1.5 | 1 |  |  | **X** |  |  |  | **X** |
| IDALNENK | 85-92 | 458.7397 | 458.7404 | 1.5 | 2 |  |  |  |  |  |  |  |
| VLVL | 93-96 | 443.3233 | 443.3228 | -1.1 | 1 |  |  |  | **X** | **X** | **X** |  |
| VLVLDTDYK | 93-101 | 533.2955 | 533.2950 | -0.9 | 2 |  |  |  | **X** |  | **X** |  |
| LVR | 123-125 | 387.2711 | 387.2714 | 0.8 | 1 |  |  |  |  | **X** |  |  |
| VDDEALEKF | 129-137 | 533.2599 | 533.2586 | -2.4 | 2 |  | **X** |  | **X** |  |  |  |
| EALEKFDKALKALPMHIRL | 132-150 | 445.4613 | 445.4595 | -4.0 | 5 |  |  |  |  |  |  | **X** |
| DKALKALPMHIRL | 138-150 | 377.2297 | 377.2301 | 1.1 | 4 |  |  |  |  |  |  | **X** |
| ALKALP | 140-145 | 306.7073 | 306.7076 | 1.0 | 2 |  |  |  | **X** |  | **X** |  |
| ALKALPMHIRL | 140-150 | 316.4497 | 316.4496 | -0.3 | 3 and 4 |  | **X** | **X** | **X** | **X** | **X** |  |
| KALPMHIR | 142-149 | 322.5289 | 322.5286 | -0.9 | 3 |  | **X** |  |  |  |  |  |
| KALPMHIRL | 142-150 | 539.8311 | 539.8313 | 0.4 | 2 and 3 |  | **X** | **X** | **X** | **X** | **X** |  |
| PMHIRLS | 145-151 | 427.2397 | 427.2393 | -0.9 | 2 |  | **X** |  | **X** |  |  |  |
| HIRLSFNPT | 147-155 | 542.7983 | 542.7985 | 0.4 | 2 |  | **X** | **X** | **X** | **X** | **X** |  |

**Author Contributions:** Conceptualization, L.S.; methodology, L.S and D.T.; software, S.M.; validation, S.M.; investigation, S.M. I.M., M.B.; data curation, S.M., L.S. and D.T.; X.X.; resources, VP; writing—original draft preparation, L.S.; writing—review and editing, S.M., I.M., M.B., V.P., D.T., L.S.; funding acquisition, L.S and D.T. All authors have read and agreed to the published version of the manuscript.

**Funding:** This work was funded by Fondo di Ateneo per la Ricerca FAR2020 granted by the Department of Life Sciences, University of Modena and Reggio Emilia, Italy.

**Data Availability Statement:** The nucleotide sequences of 26S rDNA D1/D2 domain are available in GenBank NCBI database under the accession numbers MZ491084 to MZ491094.

**Conflicts of Interest:** The authors declare no conflict of interest. The funders had no role in the design of the study; in the collection, analyses, or interpretation of data; in the writing of the manuscript, or in the decision to publish the results. VP is employed by Consorzio del Formaggio Parmigiano Reggiano. This does not alter the authors' adherence to all the journal policies on sharing data and materials.

References

1. Edgar, R.C. MUSCLE: multiple sequence alignment with high accuracy and high throughput. *Nucleic Acids Res.* **2004**, *32*, 1792–1797.
2. Kumar, S., Stecher, G.; Li, M.; Knyaz, C.; Tamura, K. MEGA X: Molecular evolutionary genetics analysis across computing platforms. *Mol Biol Evol.* **2018**, *35*, 1547–1549.
3. Waterhouse, A.M.; Procter, J.B.; Martin, D.M.A.; Clamp, M.; Barton, G.J. Jalview Version 2—a multiple sequence alignment editor and analysis workbench. *Bioinformatics* **2009**, *25*, 1189–1191.
4. Kahm, M.; Hasenbrink, G.; Lichtenberg-frate, H.; Ludwig, J.; Kschischo, M. Grofit: fitting biological growth curves. *J. Stat. Softw*. **2010**, *33*, 1–21.
